# Supplementary material for: Comparative evaluation of 16S rRNA metagenomic sequencing in the diagnosis and understanding of bacterial endophthalmitis
Source: HighWire-hosted journal article supplement (doi:10.1136/bmjophth-2023-001342), 2023-09-01
Supplement: bmjophth-2023-001342supp001_data_supplement.pdf [file bmjophth-2023-001342supp001_data_supplement.pdf]

Supplemental Table 1: Clinical data and background of each patient

| Case | Age Range | Sex | Laterality | Past history                                             | Intra     |                        | Bacterial culture                 | Microbiome results                | Group | Total Reads | Coverage (%) |
|------|-----------|-----|------------|----------------------------------------------------------|-----------|------------------------|-----------------------------------|-----------------------------------|-------|-------------|--------------|
|      |           |     |            |                                                          | logMAR VA | ocular pressure (mmHg) |                                   |                                   |       |             |              |
| 1    | 55-60     | F   | Left       | uveitis, atopic dermatitis                               | -0.08     | 19                     | —                                 | —                                 | III   | 87,355      | —            |
| 2    | 60-65     | M   | Left       | post-glaucoma surgery                                    | 1.2       | 12                     | —                                 | —                                 | III   | 48,393      | —            |
| 3    | 70-75     | F   | Left       | sepsis                                                   | 2         | 15                     | —                                 | —                                 | III   | 40,505      | —            |
| 4    | 80-85     | F   | Right      | uveitis                                                  | 2         | 11                     | —                                 | —                                 | III   | 67,000      | —            |
| 5    | 20-25     | M   | Right      | uveitis                                                  | 2         | 11                     | —                                 | —                                 | III   | 64,511      | —            |
| 6    | 75-80     | M   | Right      | post-cataract surgery                                    | 1.4       | 7                      | <i>Staphylococcus epidermidis</i> | <i>Staphylococcus epidermidis</i> | I     | 94,147      | 99.7         |
| 7    | 70-75     | F   | Right      | sepsis, type1DM                                          | 2         | 15                     | <i>Klebsiella pneumoniae</i>      | <i>Klebsiella pneumoniae</i>      | I     | 82,462      | 67.6         |
| 8    | 60-65     | M   | Left       | post-cataract surgery                                    | 2         | 18                     | <i>Staphylococcus aureus</i>      | <i>Staphylococcus aureus</i>      | I     | 58,357      | 45.7         |
| 9    | 60-65     | M   | Right      | chronic kidney disease, HD                               | LP        | 29                     | <i>Staphylococcus aureus</i>      | <i>Staphylococcus aureus</i>      | I     | 47,774      | 33.4         |
| 10   | 35-40     | M   | Right      | trauma                                                   | 1.5       | 8                      | —                                 | —                                 | III   | 59,400      | —            |
| 11   | 70-75     | F   | Right      | post-glaucoma surgery                                    | NLP       | 26                     | <i>Streptococcus mitis</i>        | <i>Streptococcus mitis</i>        | I     | 39,985      | 99.4         |
| 12   | 40-45     | F   | Right      | scleritis                                                | 2         | 6                      | —                                 | —                                 | III   | 109,838     | —            |
| 13   | 70-75     | F   | Right      | uveitis                                                  | 2         | 12                     | —                                 | —                                 | III   | 83,841      | —            |
| 14   | 75-80     | M   | Right      | post-penetrating keratoplasty, cytomegalovirus infection | 1.4       | 22                     | —                                 | <i>Pseudomonas veronii</i>        | II    | 69,739      | 38.1         |
| 15   | 50-55     | F   | Right      | post cataract surgery                                    | 0         | 10                     | —                                 | <i>Pseudomonas veronii</i>        | II    | 93,399      | 40.6         |
| 16   | 75-80     | M   | Right      | post-cataract surgery                                    | 0.52      | 22                     | —                                 | <i>Bradyrhizobium japonicum</i>   | II    | 52,606      | 65.9         |

|    |       |   |       |                           |       |    |                              |                                      |    |         |      |
|----|-------|---|-------|---------------------------|-------|----|------------------------------|--------------------------------------|----|---------|------|
| 17 | 45-50 | M | Right | prostatic abscess         | 2     | 19 | <i>Klebsiella pneumoniae</i> | <i>Klebsiella pneumoniae</i>         | I  | 64,830  | 68.0 |
| 18 | 55-60 | M | Left  | post-cataract surgery, DM | 0.7   | 24 | –                            | <i>Bradyrhizobium japonicum</i>      | II | 32,264  | 37.9 |
| 19 | 70-75 | M | Left  | Orbital cellulitis, DM    | LP    | 34 | –                            | <i>Methylobacterium mesophilicum</i> | II | 69,739  | 27.0 |
| 20 | 85-90 | M | Right | prostate cancer           | LP    | 30 | –                            | <i>Staphylococcus aureus</i>         | II | 133,000 | 77.2 |
| 21 | 10-15 | M | Right | trauma                    | -0.08 | 16 | –                            | <i>Methylobacterium adhaesivum</i>   | II | 64,731  | 79.5 |

M = male; F = female; logMAR = logarithm of the minimum angle of resolution; VA = visual acuity LP = light perception; NLP = no light perception; HD = Hemodiafiltration; DM = Diabetes mellitus
